# Supplementary material
Source: Royal Society of Chemistry journal article supplement (doi:10.1039/d6cy00216a)
Supplement: d6cy00216a1.pdf [file d6cy00216a1.pdf]

## Supporting Information

# Nickel catalysts in the hydrogenation of benzyltoluene using impure hydrogen streams

Lukas Popp, Patrick Schühle

*Institute of Chemical Reaction Engineering, Friedrich-Alexander-Universität  
Erlangen-Nürnberg, 91058 Erlangen, Germany*

*KEYWORDS Hydrogenation, Hydrogen purification, Nickel catalyst, Liquid organic hydrogen carrier*

### S1 Equations

Selectivity

$$S_{Hx-BT, t_i} = \frac{A_{total, formed Hx-BT \text{ until } t_i}}{A_{total, consumed H0-BT \text{ until } t_i}} \quad (1)$$

Conversion

$$X_{t_i} = \frac{A_{H0-BT, total} - A_{H0-BT, t_i}}{A_{H0-BT, total}} \quad (2)$$

Degree of hydrogenation

$$DoH = \frac{A_{H12-BT} + A_{H6-BT}}{A_{H12-BT} + A_{H6-BT} + A_{H0-BT}} \quad (3)$$

Hydrogen utilization

$$Utilization = \frac{mol_{H_2, H0-BT \text{ hydrogenation}}}{mol_{H_2, total \text{ consumption}}} \quad (4)$$

*Table S 1 liquid and gas sampling intervals for the hydrogenation experiments*

| REACTION TIME [min] | LIQUID SAMPLE [-] | GAS SAMPLE [-] |
|---------------------|-------------------|----------------|
| 0                   | X                 | X              |
| 10                  | X                 | -              |
| 20                  | X                 | -              |
| 30                  | X                 | X              |
| 45                  | X                 | -              |

|     |   |   |
|-----|---|---|
| 60  | X | X |
| 90  | X | X |
| 120 | X | X |
| 150 | - | - |
| 180 | X | X |
| 240 | X | X |
| 300 | X | X |
| 360 | X | X |

## S2 Discussion and Results

### TEMPERATUR VARIATION

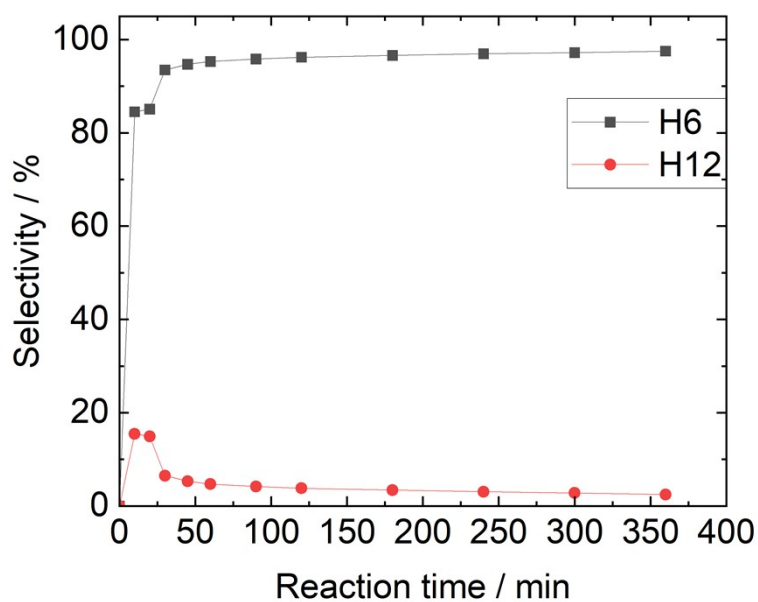

Figure S 1 Selectivity for H6-Benzyltoluene (black) and H12 Benzyltoluene (red) of Benzyltoluene hydrogenation using a commercial Nickel catalyst (reaction conditions:  $m_{BT} = 100g$ ,  $p = 50bar$ ,  $T = 170^{\circ}C$ ,  $t = 6h$ , **CO-gas fraction 6%**)

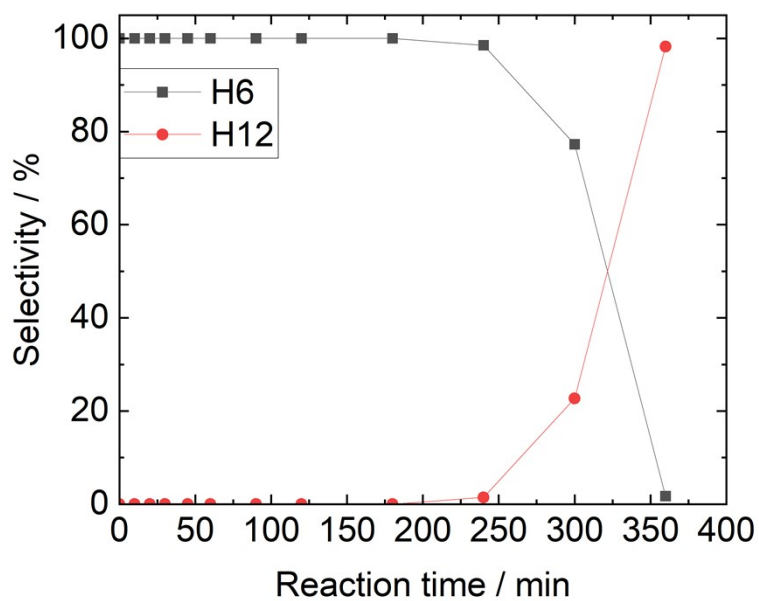

Figure S 2 Selectivity for H6-Benzyltoluene (black) and H12 Benzyltoluene (red) of Benzyltoluene hydrogenation using a commercial Nickel catalyst (reaction conditions:  $m_{BT} = 100g$ ,  $p = 50bar$ ,  $T = 200^{\circ}C$ ,  $t = 6h$ , **CO-gas fraction 6%**)

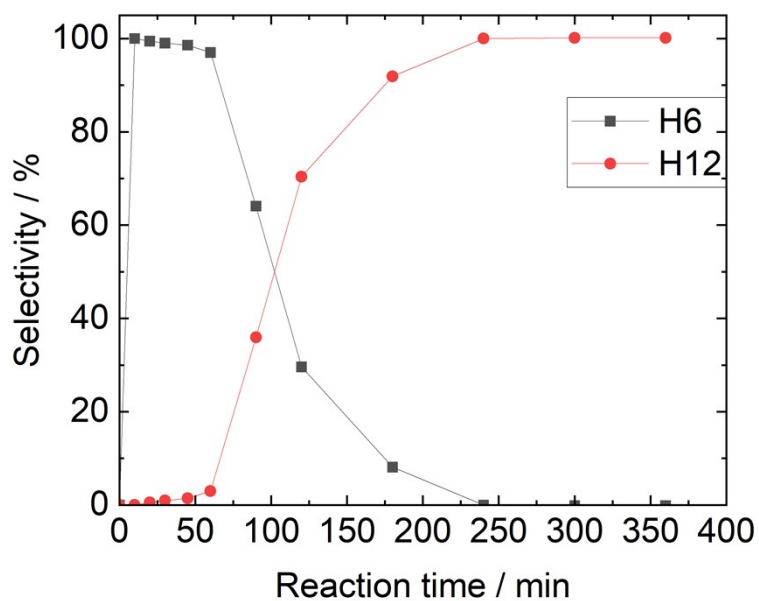

Figure S 3 Selectivity for H6-Benzyltoluene (black) and H12 Benzyltoluene (red) of Benzyltoluene hydrogenation using a commercial Nickel catalyst (reaction conditions:  $m_{BT} = 100g$ ,  $p = 50bar$ ,  $T = 230^{\circ}C$ ,  $t = 6h$ , **CO-gas fraction 6%**)

## VARIATION OF TOAL PRESSURE

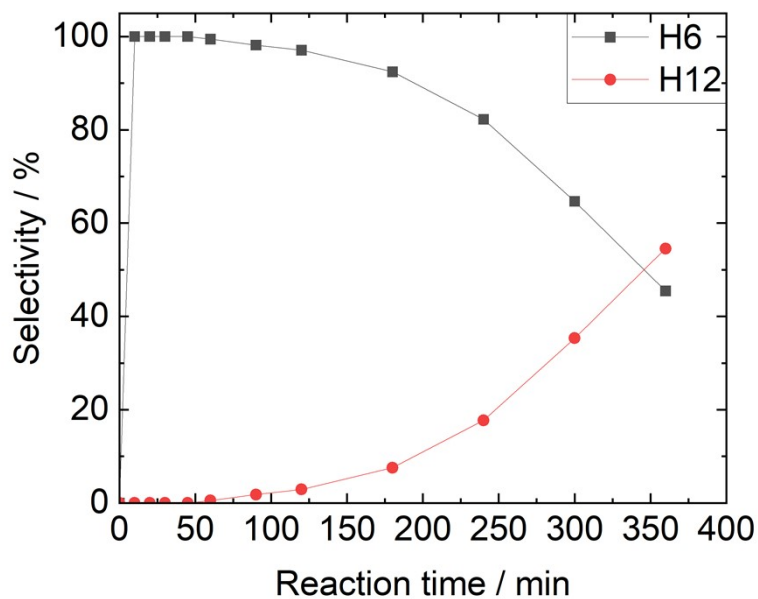

Figure S 4 Selectivity for H6-Benzyltoluene (black) and H12 Benzyltoluene (red) of Benzyltoluene hydrogenation using a commercial Nickel catalyst at 10 bar (reaction condition:  $m_{BT} = 100g$ ,  $T = 200^{\circ}C$ ,  $t = 6h$ , CO-gas fraction 1.2%)

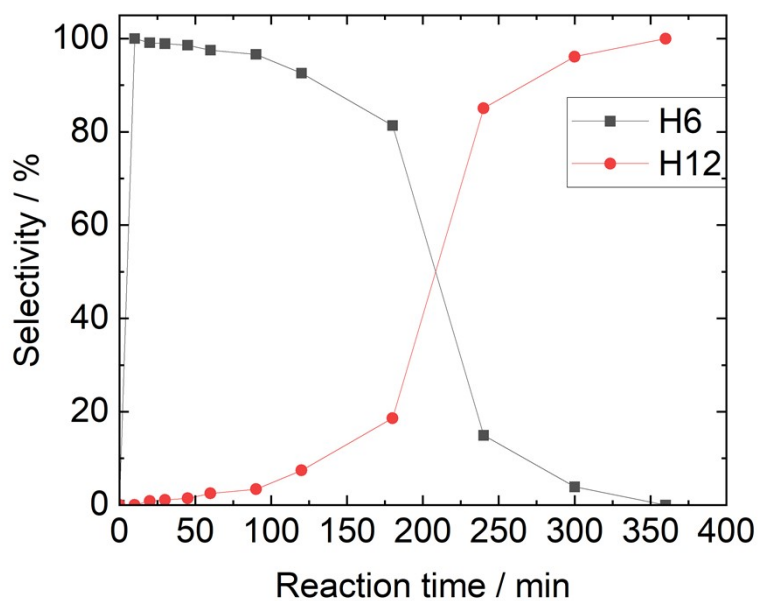

Figure S 5 Selectivity for H6-Benzyltoluene (black) and H12 Benzyltoluene (red) of Benzyltoluene hydrogenation using a commercial Nickel catalyst at 30 bar (reaction conditions:  $m_{BT} = 100g$ ,  $T = 200^{\circ}C$ ,  $t = 6h$ , CO-gas fraction 1.2%)

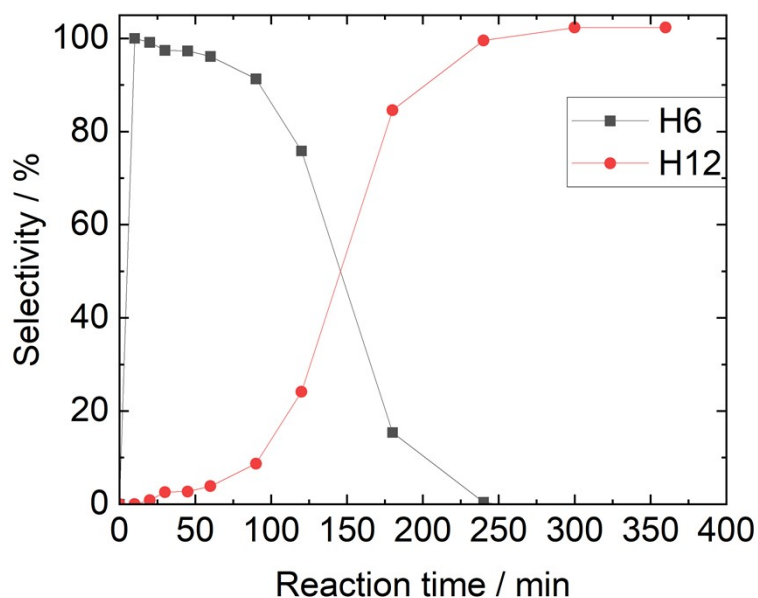

Figure S 6 Selectivity for H6-Benzyltoluene (black) and H12 Benzyltoluene (red) of Benzyltoluene hydrogenation using a commercial Nickel catalyst at 50 bar (reaction conditions:  $m_{BT} = 100g$ ,  $T = 200^{\circ}C$ ,  $t = 6h$ , CO-gas fraction 1.2%)

#### GAS VARIATION

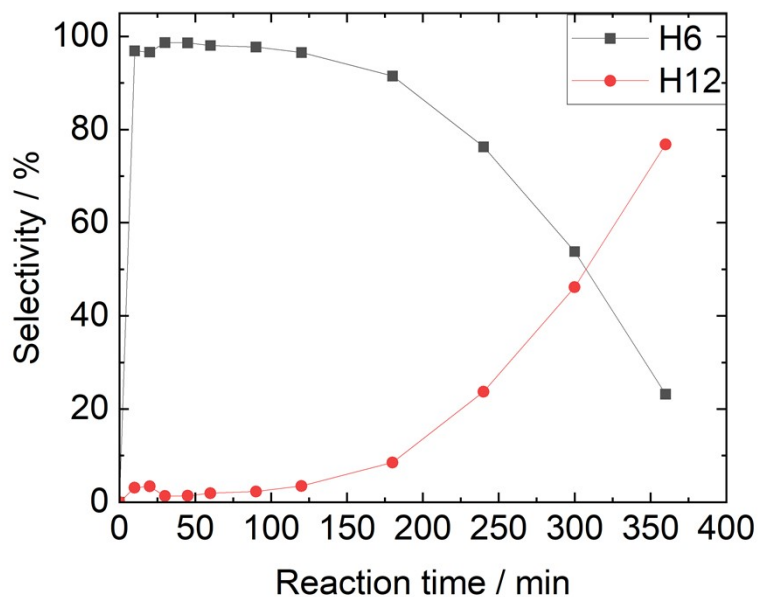

Figure S 7 Selectivity for H6-Benzyltoluene (black) and H12 Benzyltoluene (red) of Benzyltoluene hydrogenation using a commercial Nickel catalyst (reaction conditions:  $m_{BT} = 100g$ ,  $p = 50bar$ ,  $T = 170^{\circ}C$ ,  $t = 6h$ , CO-gas fraction 0.6%)

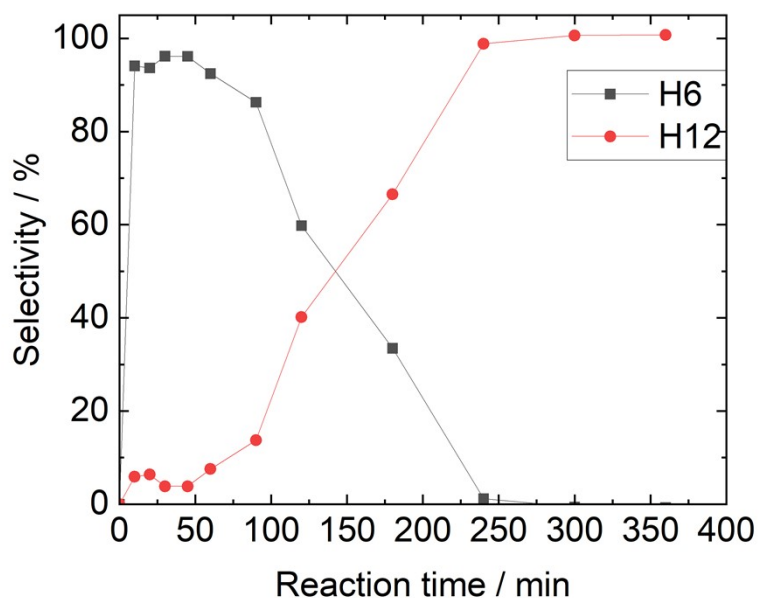

Figure S 8 Selectivity for H6-Benzyltoluene (black) and H12 Benzyltoluene (red) of Benzyltoluene hydrogenation using a commercial Nickel catalyst (reaction conditions:  $m_{BT} = 100g$ ,  $p = 50bar$ ,  $T = 200^{\circ}C$ ,  $t = 6h$ , **CO-gas fraction 0.6%**)

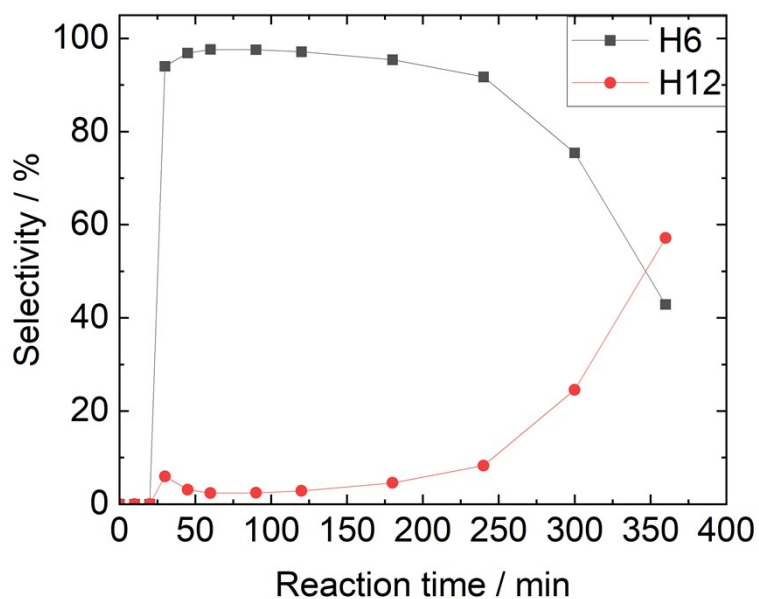

Figure S 9 Selectivity for H6-Benzyltoluene (black) and H12 Benzyltoluene (red) of Benzyltoluene hydrogenation using a commercial Nickel catalyst with **15 bar  $N_2$ -partial pressure** (reaction conditions:  $m_{BT} = 100g$ ,  $p = 50bar$ ,  $T = 170^{\circ}C$ ,  $t = 6h$ , **CO-gas fraction 0.6%**)

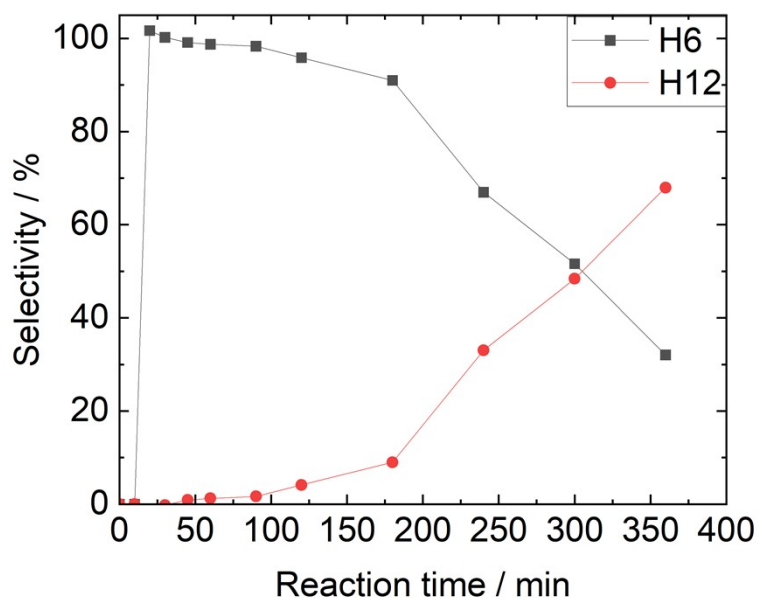

Figure S 10 Selectivity for H6-Benzyltoluene (black) and H12 Benzyltoluene (red) of Benzyltoluene hydrogenation using a commercial Nickel catalyst with **15 bar N<sub>2</sub>-partial pressure** (reaction conditions:  $m_{BT} = 100g$ ,  $p = 50bar$ ,  $T = 200^{\circ}C$ ,  $t = 6h$ , **CO-gas fraction 0.6%**)

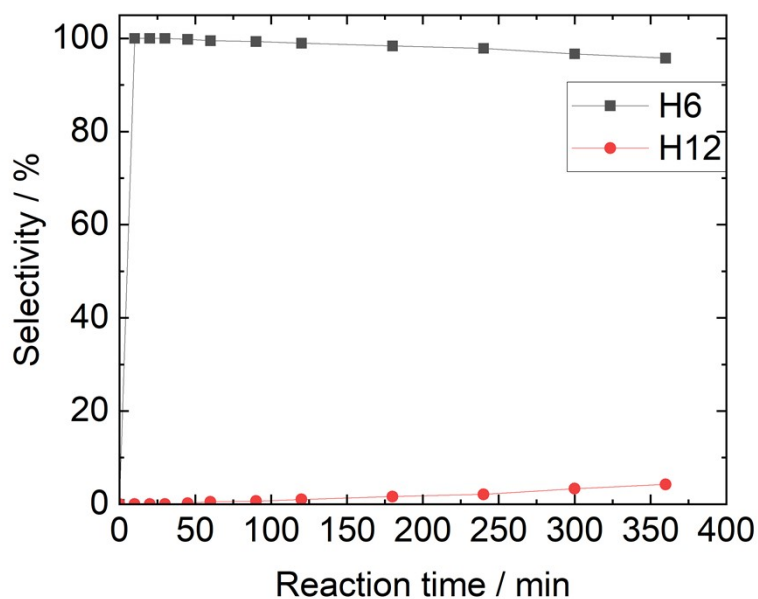

Figure S 11 Selectivity for H6-Benzyltoluene (black) and H12 Benzyltoluene (red) of Benzyltoluene hydrogenation using a commercial Nickel catalyst with **15 bar CO<sub>2</sub>-partial pressure** (reaction conditions:  $Ru/BT$  ratio: 1/2000;  $m_{BT} = 100g$ ,  $p = 50bar$ ,  $T = 170^{\circ}C$ ,  $t = 6h$ , **CO-gas fraction 0.6%**)

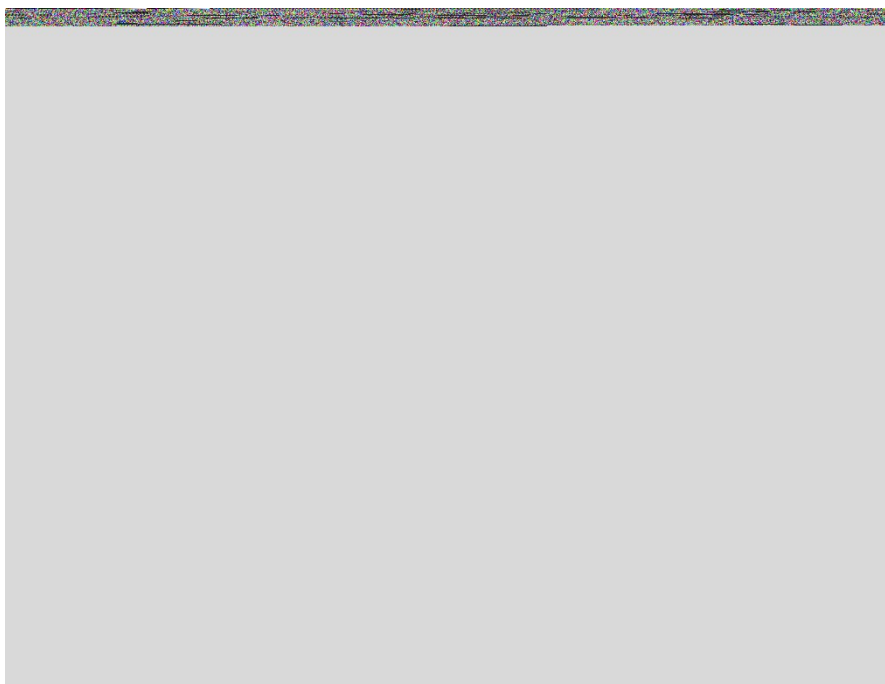

Figure S 12 Selectivity for H6-Benzyltoluene (black) and H12 Benzyltoluene (red) of Benzyltoluene hydrogenation using a commercial Nickel catalyst with 15 bar CO<sub>2</sub>-partial pressure (reaction conditions: Ru/BT ratio: 1/2000; m<sub>BT</sub> = 100g, p = 50bar, T= 200°C, t = 6h, CO-gas fraction 0.6%)

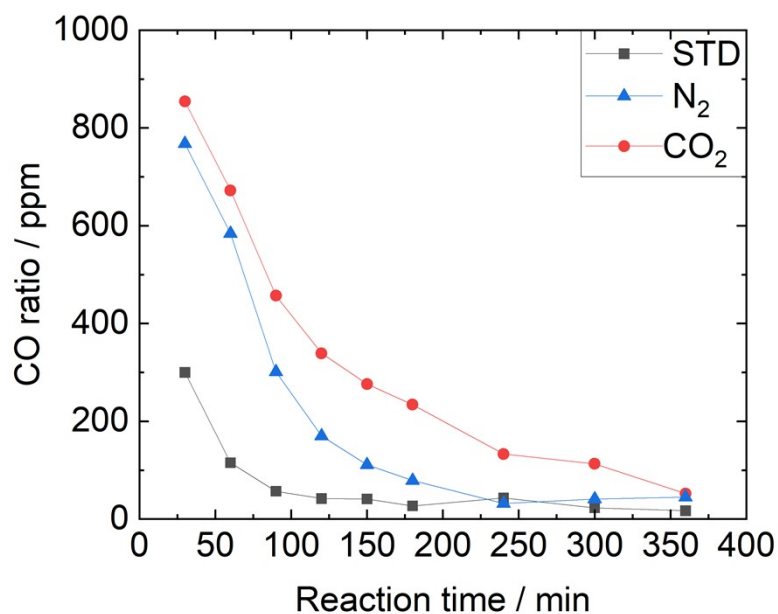

Figure S 13 CO ratio in ppm over reaction time for the Benzyltoluene hydrogenation using a commercial Nickel catalyst and N<sub>2</sub> and CO<sub>2</sub> as additional gases, compared to a hydrogenation experiment with CO as only impurity (STD), (reaction conditions: Ni/BT ratio 0.045; m<sub>BT</sub> = 100 g, p = 50 bar, p<sub>N<sub>2</sub>/CO<sub>2</sub></sub> = 15 bar, T = 200 °C, t = 6 h, CO-gas fraction 0,6 %)

## S3 Catalyst stability

XRD results

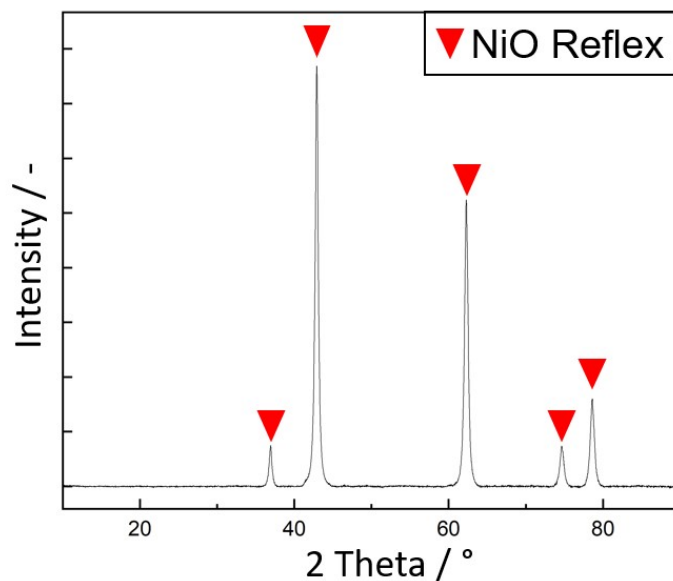

Figure S 14 XRD-pattern for an unused Ni catalyst (black) compared to simulated NiO reflexes (Red; ICSD reference code: 98-016-6112)

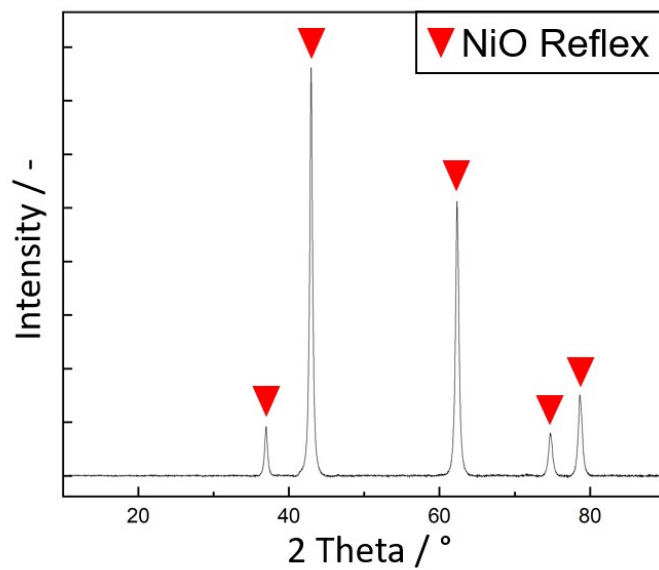

Figure S 15 XRD-pattern for a spent Ni catalyst (black, reaction conditions:  $m_{BT} = 100g$ ,  $p = 50bar$ ,  $T = 200^{\circ}C$ ,  $t = 6h$ , CO-gas fraction 1.2%) compared to simulated NiO reflexes (Red; ICSD reference code: 98-016-6112)

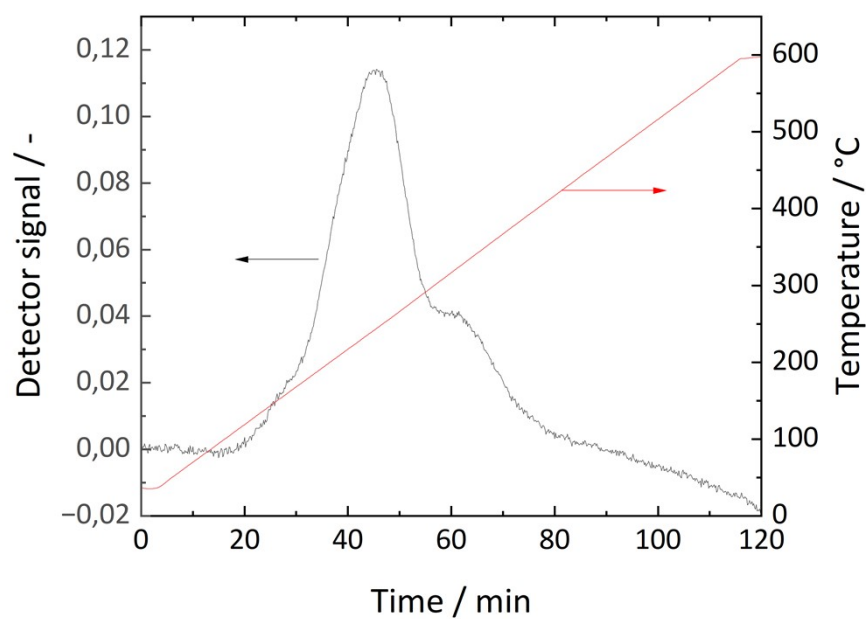

Figure S 16 H<sub>2</sub>-TPR Measurement of the commercial Ni catalyst (H<sub>2</sub>-flow = 20 cm<sup>3</sup> min<sup>-1</sup>, Temperature ramp = 5 °C min<sup>-1</sup>)

Table S2 Nickel content determined with ICP-OES, Surface area and pore volume determined with nitrogen physisorption for fresh and spent Ni catalyst (reaction conditions:  $m_{BT} = 100\text{g}$ ,  $p = 50\text{bar}$ ,  $T = 200^\circ\text{C}$ ,  $t = 6\text{h}$ , CO-gas fraction 1.2%)

| <b>MATERIAL</b>                        | <b>NI CONTENT<br/>[WT%]</b> | <b>SURFACE AREA<br/>[m<sup>2</sup>/g]</b> | <b>PORE VOLUME<br/>[cc/g]</b> |
|----------------------------------------|-----------------------------|-------------------------------------------|-------------------------------|
| <b>NI CATALYST<br/>BEFORE REACTION</b> | 50,2                        | 2.232x10 <sup>2</sup>                     | 2.798x10 <sup>-1</sup>        |
| <b>NI CATALYST<br/>AFTER REACTION</b>  | 52,0                        | 2.367 x10 <sup>2</sup>                    | 3.278x10 <sup>-1</sup>        |
